# Supplementary material
Source: Springer Nature journal article supplement (https://www.springermedizin.de/resource/supplementary/12998_2010_110_MOESM3_ESM.pdf/9623658)
Supplement: MOESM3 [file 9623658]

139 patients included

2  
missing data from  
diagnostic class

29 reliability  
only

6 reliability  
+ main study

102 main study  
only

35  
study population  
reliability

108  
included  
main study

32  
drop out before week 12

76  
study population  
main study
